# Supplementary material for: Inducing ordered Li deposition on a PANI-decorated Cu mesh for an advanced Li anode
Source: Royal Society of Chemistry journal article supplement (doi:10.1039/d0ta03929b), 2020-01-01
Supplement: d0ta03929b1.pdf [file d0ta03929b1.pdf]

## Supporting Information

### **Inducing ordered Li deposition on PANI-decorated Cu mesh for advanced Li anode**

Xin-Yu Hu,<sup>‡a</sup> Pan Xu,<sup>‡a</sup> Shengwen Deng,<sup>a</sup> Jie Lei,<sup>a</sup> Xiaodong Lin,<sup>a</sup> Qi-Hui Wu,<sup>b</sup> Mingsen Zheng<sup>\*a</sup> and Quanfeng Dong<sup>a</sup>

<sup>a</sup> State Key Laboratory of Physical Chemistry of Solid Surfaces, Department of Chemistry, College of Chemistry and Chemical Engineering, Collaborative Innovation Center of Chemistry for Energy Materials (*iChEM*), Xiamen University, Xiamen, Fujian 361005, China

<sup>b</sup> College of Mechanical and Energy Engineering, Jimei University, Xiamen 361021, China.

<sup>‡</sup>These authors contributed equally to this work.

\*Correspondence: mszheng@xmu.edu.cn

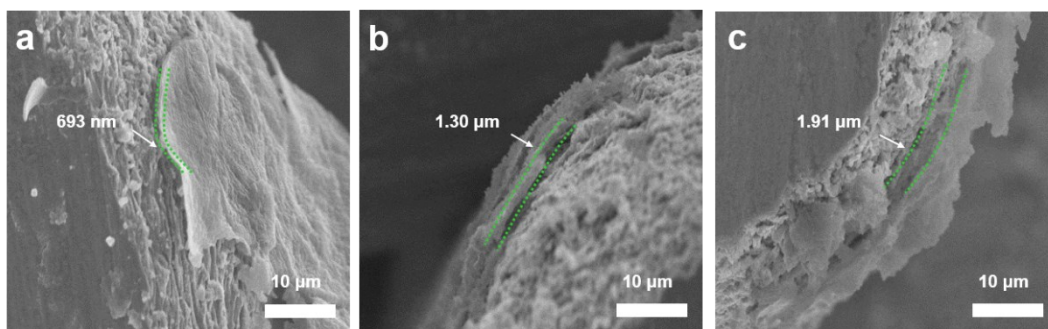

**Figure S1.** Thickness of PANI micro-sheets with different reaction time of (a) 1.5 h, (b) 2 h and (c) 2.5 h.

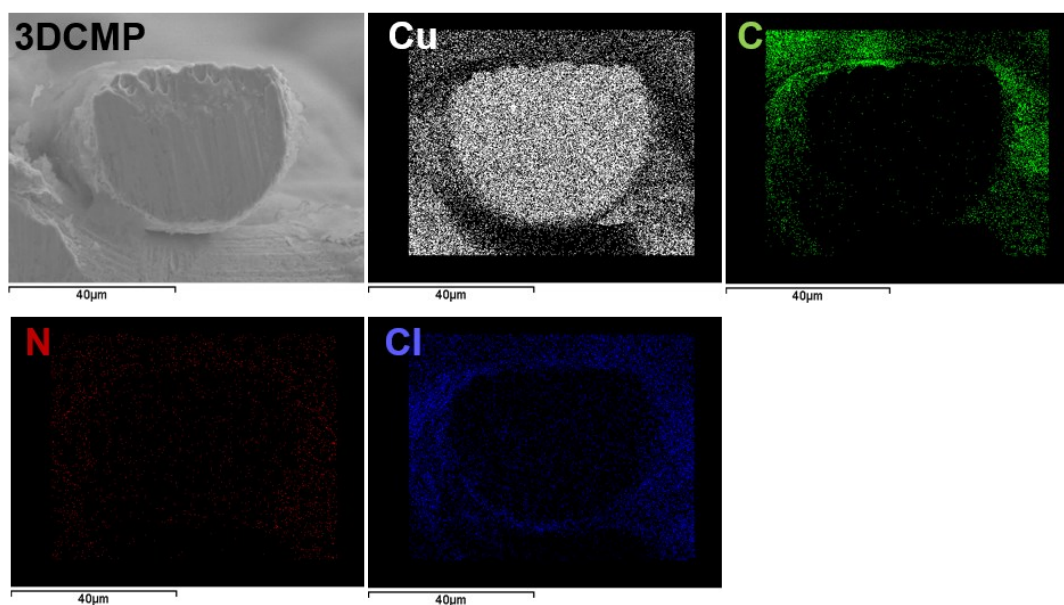

**Figure S2.** The side section EDS-maps of the 3DCMP electrode.

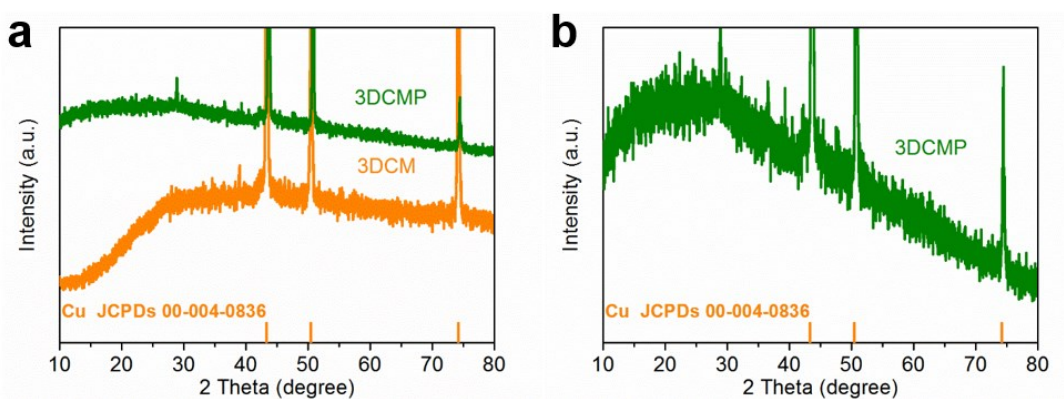

**Figure S3.** The enlarged XRD pattern of the 3DCM and 3DCMP electrode.

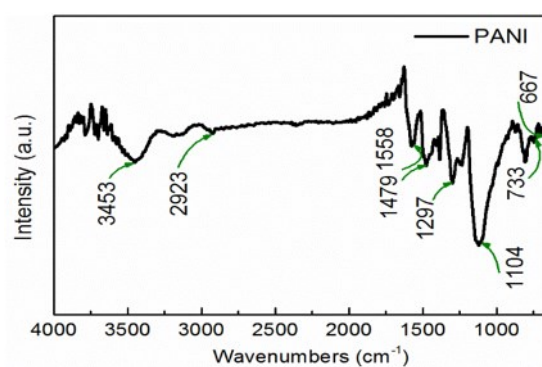

Figure S4. FTIR spectroscopy of PANI powders.

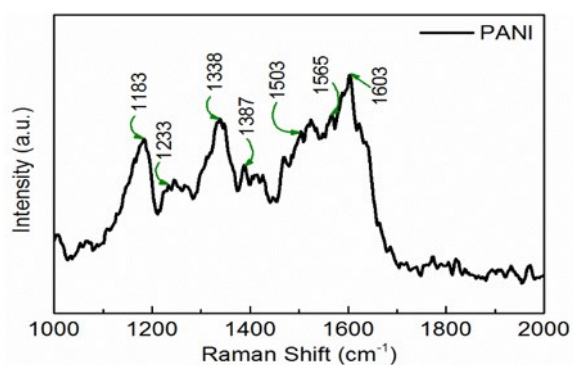

Figure S5. Raman spectroscopy of PANI powders.

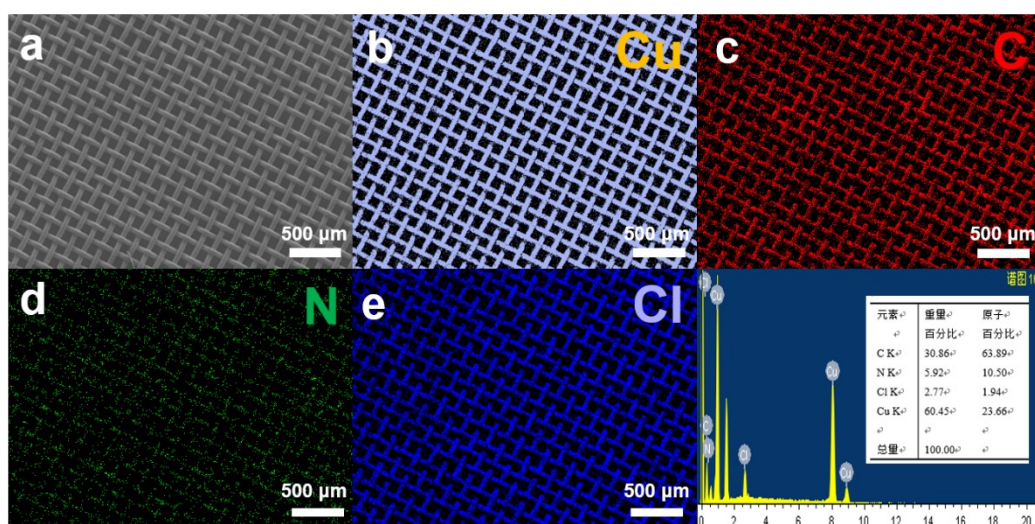

Figure S6. The SEM-EDS maps and energy spectrum analysis of the 3DCMP electrode. To avoid confusion of the C element, we use aluminum foil instead of conductive adhesive for the test.

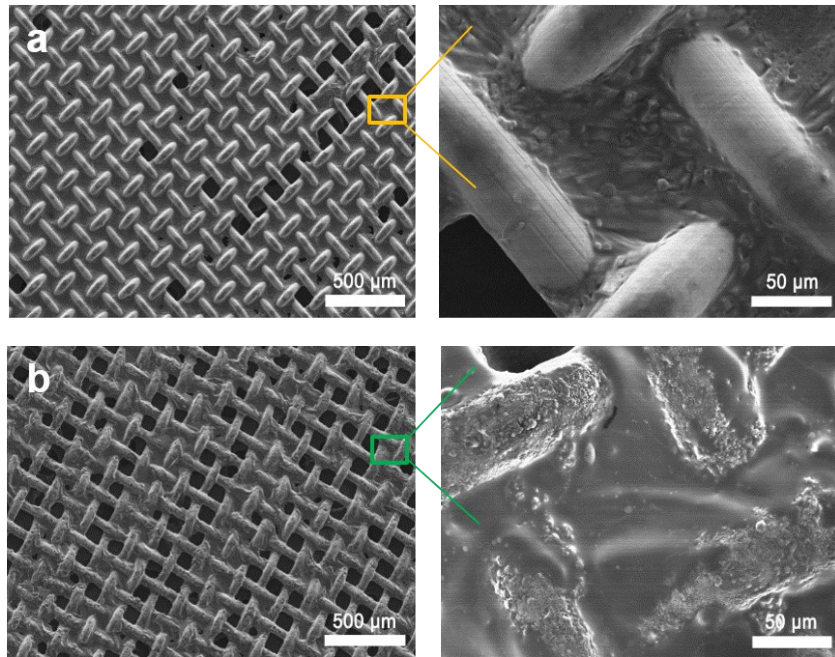

**Figure S7.** The SEI morphologies of the (a) 3DCM and (b) 3DCMP anodes after the half-cells discharged to 1.0 V.

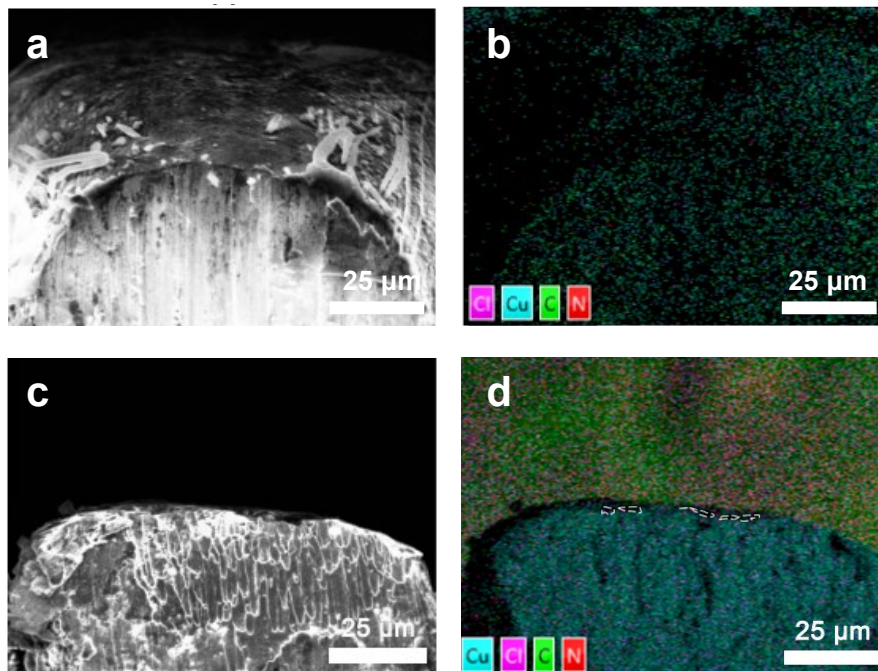

**Figure S8.** The side section SEM images and EDS-maps of the (a, b) 3DCM and (c, d) 3DCMP anodes after deposited  $3 \text{ mAh cm}^{-2}$  Li.

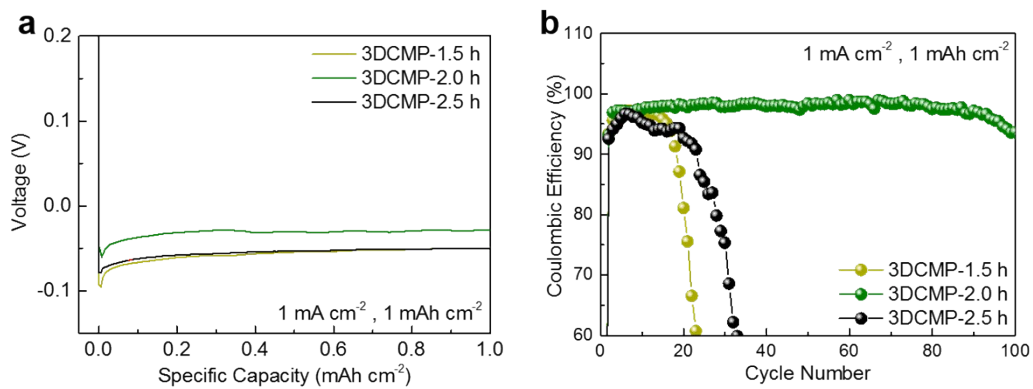

**Figure S9.** (a) Overpotential and (b) CE of the 3DCMP anodes with different thicknesses PANI micro-sheets at  $1 \text{ mA cm}^{-2}$  with  $1 \text{ mAh cm}^{-2}$ .

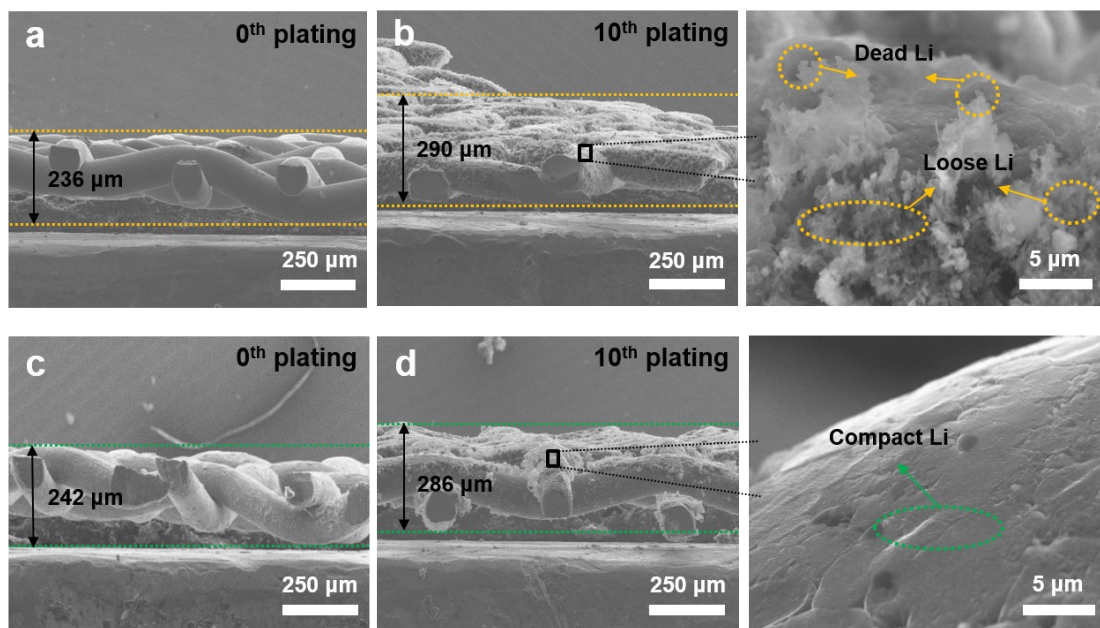

**Figure S10.** Cross-section view of the (a, b) 3DCM and (c, d) 3DCMP anodes cycled at  $1 \text{ mA cm}^{-2}$  with  $1 \text{ mAh cm}^{-2}$  before and after 10 cycles.

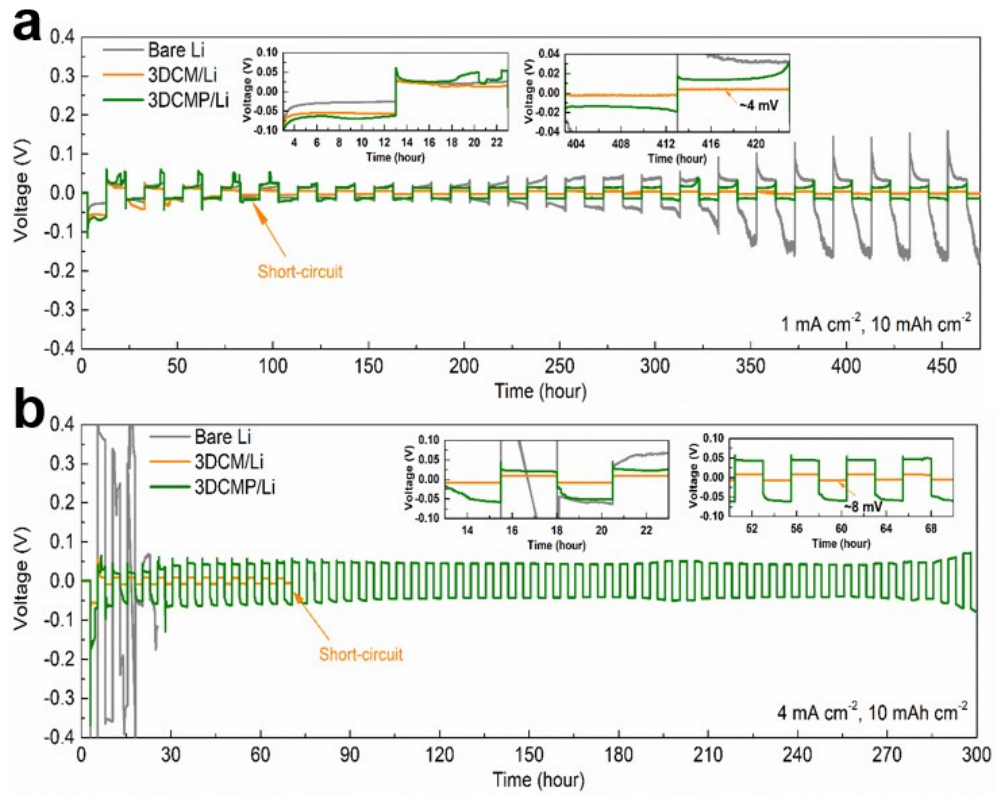

**Figure S11.** Symmetrical-cell performance of the bare Li, 3DCM/Li and 3DCMP/Li anodes at (a) 1 mA cm<sup>-2</sup> and (b) 4 mA cm<sup>-2</sup> with 10 mAh cm<sup>-2</sup>.

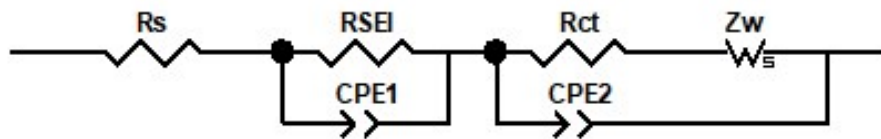

**Figure S12.** The equivalent circuit schematic of Figure 5 (d-f).

**Table S1.** The fitted impedance parameters of Figure 5 (d-f).

|                             | <b>Bare Li</b>     |                        |                       | <b>3DCM/Li</b>     |                        |                       | <b>3DCMP/Li</b>    |                        |                       |
|-----------------------------|--------------------|------------------------|-----------------------|--------------------|------------------------|-----------------------|--------------------|------------------------|-----------------------|
|                             | $R_S$ ( $\Omega$ ) | $R_{SEI}$ ( $\Omega$ ) | $R_{ct}$ ( $\Omega$ ) | $R_S$ ( $\Omega$ ) | $R_{SEI}$ ( $\Omega$ ) | $R_{ct}$ ( $\Omega$ ) | $R_S$ ( $\Omega$ ) | $R_{SEI}$ ( $\Omega$ ) | $R_{ct}$ ( $\Omega$ ) |
| <b>0<sup>th</sup> cycle</b> | 2.80               | 3.82                   | 48.21                 | 2.81               | 21.77                  | 26.89                 | 4.01               | 5.74                   | 3.78                  |
| <b>1<sup>st</sup> cycle</b> | 2.78               | 2.62                   | 29.88                 | 2.92               | 17.30                  | 12.50                 | 3.82               | 5.94                   | 4.86                  |
